# Supplementary material for: GC-HRMS analysis to evaluate the effectiveness of ozone disinfection in the removal of micropollutants from wastewater
Source: Royal Society of Chemistry journal article supplement (doi:10.1039/d2ew00879c), 2023-01-01
Supplement: d2ew00879c1.pdf [file d2ew00879c1.pdf]

## GC-HRMS analysis to evaluate the effectiveness of ozone disinfection for the removal of micropollutants from wastewater

Raíssa Olivia Barbacena<sup>a</sup>, Joyce Cristale<sup>a,b</sup>, Carlos Barata<sup>c</sup>, Silvia Lacorte<sup>c\*</sup>, Renato F. Dantas<sup>a\*</sup>

<sup>a</sup> School of Technology, University of Campinas – UNICAMP, Paschoal Marmo 1888, 13484332, Limeira, SP, Brazil

<sup>b</sup> Center for Nuclear Energy in Agriculture, University of São Paulo (CENA-USP), Av Centenário 303, 13416-000 Piracicaba SP, Brazil

<sup>c</sup> Department of Environmental Chemistry, IDAEA-CSIC, Jordi Girona 18-26, 08034 Barcelona, Spain

\*Corresponding author e-mail: [bqam@cid.csic.es](mailto:bqam@cid.csic.es), [renatofalcaod@ft.unicamp.br](mailto:renatofalcaod@ft.unicamp.br)

### Appendices

**Table A.1.** Instrumental conditions for chromatographic separation and data acquisition

| Item                               | Value                          |
|------------------------------------|--------------------------------|
| <b>TRACE 1300 Series GC method</b> |                                |
| Splitless time                     | 1 min                          |
| Initial Temperature                | 70° C                          |
| Carrier flow                       | 1 mL/ min                      |
| <i>Ramp 1</i>                      | 6°C to 175°C, hold time 4 min  |
| <i>Ramp 2</i>                      | 3° C to 235°C, hold time 0 min |

|                              |                               |
|------------------------------|-------------------------------|
| <i>Ramp 3</i>                | 7°C to 305°C, hold time 8 min |
| <b>Q Exactive GC</b>         |                               |
| Method duration (time)       | 60 min                        |
| Mass tolerance (+/-)         | 5 ppm                         |
| Ionization – Electron energy | 70 eV                         |
| MS transfer line temperature | 280° C                        |
| Ion source temperature       | 260° C                        |
| Scan range                   | 70 to 1000 m/z                |

### Text S1 Toxicity test with neonate Daphnia

The methodology used to evaluate the acute toxicity was based on the OECD 202. After extraction, the evaporated extracts were suspended with 0.5 mL of acetone, and then inoculated in a 100 mL glass bottle, allowed to evaporate forming a residue thin layer in the walls. Residues were then suspended again in 50 mL water, heavily vortexed and distributed in two 20 mL vials. To each vial, 10 neonate Daphnia were inoculated. After 48 h, their immobility was monitored (table S1). Mortality responses in the different treatments were compared to those of blank samples using a nested hierarchical ANOVA design with vial nested across replicated treatments.

**Table S2** Results obtained for the toxicity test using neonate Daphnia.

|    | Ozone dose (mg O <sub>3</sub> L <sup>-1</sup> ) | Duplicate | Deaths | Deaths | Total | % | % | Mean | SD |
|----|-------------------------------------------------|-----------|--------|--------|-------|---|---|------|----|
| GW | 0                                               | A         | 0      | 0      | 10    | 0 | 0 | 0    | 0  |
|    |                                                 | B         | 0      | 0      | 10    | 0 | 0 | 0    | 0  |
|    | 0 + SPK*                                        | A         | 0      | 0      | 10    | 0 | 0 | 0    | 0  |
|    |                                                 | B         | 0      | 0      | 10    | 0 | 0 | 0    | 0  |
|    | 3.5                                             | A         | 0      | 0      | 10    | 0 | 0 | 0    | 0  |
|    |                                                 | B         | 0      | 0      | 10    | 0 | 0 | 0    | 0  |

|              |   |   |    |    |    |    |    |      |
|--------------|---|---|----|----|----|----|----|------|
|              | B | 1 | 1  | 10 | 10 | 10 | 10 | 0    |
| 7.6          | A | 0 | 0  | 10 | 0  | 0  | 0  | 0    |
|              | B | 0 | 0  | 10 | 0  | 0  | 0  | 0    |
| 15.2         | A | 0 | 0  | 10 | 0  | 0  | 0  | 0    |
|              | B | 0 | 0  | 10 | 0  | 0  | 0  | 0    |
| 22.8         | A | 2 | 3  | 10 | 20 | 30 | 25 | 3.53 |
|              | B | 2 | 1  | 10 | 20 | 30 | 25 | 3.53 |
| Blank**      | A | 0 | 0  | 10 | 0  | 0  | 0  | 0    |
|              | B | 1 | 0  | 10 | 10 | 0  | 5  | 3.53 |
| 0            | A | 0 | 0  | 10 | 0  | 0  | 0  | 0    |
|              | B | 0 | 0  | 10 | 0  | 0  | 0  | 0    |
| 3.5          | A | 0 | 0  | 10 | 0  | 0  | 0  | 0    |
|              | B | 0 | 0  | 10 | 0  | 0  | 0  | 0    |
| 7.6          | A | 0 | 0  | 10 | 0  | 0  | 0  | 0    |
|              | B | 2 | 1  | 10 | 20 | 10 | 15 | 3.53 |
| 15.2         | A | 0 | 0  | 10 | 0  | 0  | 0  | 0    |
|              | B | 0 | 0  | 10 | 0  | 0  | 0  | 0    |
| 22.8         | A | 0 | 0  | 10 | 0  | 0  | 0  | 0    |
|              | B | 3 | 2  | 10 | 30 | 20 | 25 | 3.53 |
| Blank**      | A | 1 | 1  | 10 | 10 | 10 | 10 | 0    |
|              | B | 1 | 0  | 10 | 10 | 0  | 5  | 3.53 |
| Test control | 0 | 0 | 10 | 0  | 0  | 0  | 0  | 0    |

UW

\* spiked raw sample

\*\*experimental blanks (extraction procedures)
